# Supplementary material for: The Impact of Rapid Weight Loss on Oxidative Stress Markers and the Expression of the Metabolic Syndrome in Obese Individuals
Source: Hindawi journal article supplement (doi:10.1155/2013/729515), 2013-01-01
Supplement: f1 [file 729515.f1.pdf]

**Supplemental Table 1:** Criteria of the metabolic syndrome - American Heart Association/National Heart, Lung and Blood Institute (AHA/NHLBI) Scientific Statement

| <b>Risk factor</b>                  | <b>Defining level</b>               |
|-------------------------------------|-------------------------------------|
| Waist circumference<br>Men<br>Women | >40 in (>102 cm)<br>>35 in (>88 cm) |
| Triglycerides                       | ≥150 mg/dl                          |
| HDL cholesterol<br>Men<br>Women     | <40 mg/dl<br><50 mg/dl              |
| Blood pressure                      | ≥130/≥85 mm Hg                      |
| Fasting glucose                     | ≥100 mg/dl                          |
